# Small-Scale Heterogeneity in Deep-Sea Nematode Communities around Biogenic Structures

Christiane Hasemann\*, Thomas Soltwedel

Alfred Wegener Institute for Polar and Marine Research, Bremerhaven, Germany

## Abstract

The unexpected high species richness of deep-sea sediments gives rise to the questions, which processes produce and maintain diversity in the deep sea, and at what spatial scales do these processes operate? The idea of a small-scale habitat structure at the deep-sea floor provides the background for this study. At small scales biogenic structures create a heterogeneous environment that influences the structure of the surrounding communities and the dynamics of the meiobenthic populations. As an example for biogenic structures, small deep-sea sponges (*Tentorium semisuberites* Schmidt 1870) and their sedimentary environment were investigated for small-scale distribution patterns of benthic deep-sea nematodes. Sampling was carried out with the remotely operated vehicle Victor 6000 at the Arctic deep-sea observatory HAUSGARTEN. In order to investigate nematode community patterns sediment cores around three small sponges and corresponding control cores were analysed. A total of approx. 5800 nematodes were identified. The comparison of the nematode communities from sponge and control samples indicated an influence of the biogenic structure “sponge” on diversity patterns and habitat heterogeneity. The increased number of nematode species and functional groups found in the sediments around the sponges suggest that on a small scale the sponge acts as a gradient and creates a more diverse habitat structure. The nematode community from the sponge sediments shows a greater taxonomic variance and species richness together with lower relative abundances of the species compared to those from control sediments. Obviously, the more homogeneous habitat conditions of the control sediments offer less micro-habitats than the sediments around the sponges. This seems to reduce the number of functional groups and species coexisting in the control sediments.

**Citation:** Hasemann C, Soltwedel T (2011) Small-Scale Heterogeneity in Deep-Sea Nematode Communities around Biogenic Structures. PLoS ONE 6(12): e29152. doi:10.1371/journal.pone.0029152

**Editor:** Christian R. Voolstra, King Abdullah University of Science and Technology, Saudi Arabia

**Received:** June 24, 2011; **Accepted:** November 21, 2011; **Published:** December 28, 2011

**Copyright:** © 2011 Hasemann, Soltwedel. This is an open-access article distributed under the terms of the Creative Commons Attribution License, which permits unrestricted use, distribution, and reproduction in any medium, provided the original author and source are credited.

**Funding:** Funding was provided by institutional support (Alfred Wegener Institute for Polar and Marine Research). The funder had no role in study design, data collection and analysis, decision to publish, or preparation of the manuscript.

**Competing Interests:** The authors have declared that no competing interests exist.

\* E-mail: Christiane.Hasemann@awi.de

## Introduction

For many reasons, the deep sea is of great ecological interest. Living conditions are in an extreme range of many gradients for ecological stress (e.g. pressure or nutritional input) while at the same time the deep sea supports a rich and highly endemic fauna that varies in diversity on local, regional, and global scales [1]. Variability of biodiversity has been attributed among others to depth [2], latitude [3,4] and to sediment structure [5,6]. This high diversity of most deep-sea communities and how it is maintained are key questions in deep-sea ecology [e.g. 7–12]. Different, equilibrium (Stability Time Hypothesis) [7] and non-equilibrium hypotheses (Intermediate Disturbance Hypothesis [13], Spatial Time Hypothesis [14], Dynamic Equilibrium Hypothesis [15]) have been developed to explain the remarkably rich fauna of deep-sea soft-bottom habitats (cf. e.g. [16]).

This study captures some aspects of the non-equilibrium hypotheses that diversity is maintained by habitat heterogeneity created by biogenic structures and disturbances, respectively [17]. Benthic macro- and megafaunal organisms are able to create biogenic structures by altering the seafloor, constructing burrows and sediment mounds, leaving feeding traces and faecal pellets or building structures such as tubes. These sediment structures vary from millimetres to several centimetres in length; they disturb the sediment surface and lead to an increased nutrient flux across the

sediment-water interface. Due to low hydrodynamic forces in the deep sea, these structures persist long enough to contribute to niche diversification for smaller benthic organisms. For shallow-water habitats such effects have frequently been demonstrated [18], but only a few studies investigated the impact of biogenic structures on small sediment-inhabiting organisms (bacteria to meiofauna) in the deep sea [19–25]. Another source for small-scale spatial heterogeneity are epibenthic sessile organisms like anemones, tunicates, hydroids and sponges. They alter near bottom flows and locally enhance particle deposition and erosion [20]. Compared to other benthic structures deep-sea sponges generate a specific physico-chemical microenvironment by modifying concentration gradients of solutes and particles across the sediment-water interface [26,27]. As projecting structures they also passively interact with the near-bottom currents, thereby altering particle deposition and erosion rates [28–31]. Sponges provide a broad range of small-scale microhabitats and create a gradient of food supply for meiofauna organisms [32]. Results from these studies suggest that a specific meiofauna assemblage exists around small benthic structures.

In the present study we sampled nematode communities from sediments around centimetre-small sponges and from adjacent virtually homogeneous control sediments in the eastern Fram Strait at the deep-sea observatory HAUSGARTEN [33]. All marine free-living nematodes are members of the meiobenthos

and usually comprise up to 95% of the metazoan meiofauna inhabiting deep-sea sediments [34]. An important attribute of their populations is the high species diversity by which they are represented in a wide variety of environments [35], usually in a magnitude higher than any other major taxon [36]. Deep-sea sediments contain reams of nematode species, and it seems that even small volumes of deep-sea sediments constitute a complex and diverse habitat for nematodes [37]. In the past, ecological research often addressed nematodes as a taxonomic unit of the meiofauna and considered them as a functionally homogeneous group. In fact, the various nematode species are characterised by different morphological and functional traits. They are ecologically extremely heterogeneous and occupy different trophic positions in the benthic food web [35]. These factors make nematodes a useful tool for investigating both structural and functional diversity especially in the deep sea.

Studies on community structure are largely based on descriptions of assemblages using traditional diversity measures. The traditional way of analysing nematode community structure and diversity patterns is based on species abundance data, not take account of the phylogenetic relationships and the various ecological and biological characteristics of the nematode species. A description of biodiversity would be more ecological relevant if it is related to changes in functional diversity [38] and linked to the question what species do in an ecosystem [39]. Coupling of abundance-based, taxonomic and functional diversity can be a powerful tool in ecological research, although the relationship between them is still in an explorative field [40,41]. In the present study abundance- and taxonomy-based diversity is analysed in addition to functional diversity. Therefore, diversity of the nematode community from the HAUSGARTEN observatory is not only examined as number of species, their relative density, and taxonomic relatedness of the nematode species [42], but is also described by means of functional traits of the species. Free-living nematodes show several morphological features that are thought to be ecological relevant [43]. To describe the functional structure of the nematode community each species was classified by three different morphological features. Buccal morphology [44] is one morphological trait that has been widely used in ecological work to classify nematodes by feeding types [45,46]. Another functional classification is based on nematode tail shapes [47] as they are supposed to be important in locomotion and reproduction [43,48]. Moreover nematodes show significant differences in body size and shape [49,50]. Nematode length/width ratios describe another morphological adaption to a certain lifestyle [51–53]. In the present study each nematode species was classified into functional groups based on a combination of these morphological traits.

However, the functional group approach carries the risk of measuring the number of functional groups instead of functional diversity. Whilst the upper limit for the number of species is only restricted by the species pool, the upper limit of the number of functional groups used should be large enough to cover the entire functional trait spectrum represented in a community [54]. The functional groups used to describe functional diversity of the nematode communities at HAUSGARTEN are based on the connection of multiple morphological traits to minimise the loss of information, thus avoiding some of the problems associated with the functional group approach [55].

We examined the nematode community structure along a habitat gradient using traditional diversity measures, taxonomic properties and the functional group concept based on biological traits. These different components of biodiversity are described and compared to answer the following questions:

1. Does habitat heterogeneity affect nematode community composition on a local scale?
2. How differ the biodiversity patterns of the nematode communities from control samples compared to those from sponge samples?
3. Do the three different approaches (abundance-based, taxonomic, functional measures) provide different interpretable information on the nematode's biodiversity patterns?

## Materials and Methods

### Sampling

Sampling was carried out in the eastern Fram Strait (Arctic Ocean) during an expedition with RV L'Atalante of the Institut Français de Recherche pour l'Exploration de la Mer (IFREMER) in summer 2001. In this area, at 79°N, 04°E, the German Alfred Wegener Institute for Polar and Marine Research (AWI) established the deep-sea observatory HAUSGARTEN [33]. The samples derived from the southern HAUSGARTEN area (78°45'N, 04°52'E) at 2300 m water depth (Figure 1). All necessary permits were obtained for the described field studies.

Sediments surrounding small benthic sponges (1–2 cm in diameter) of the species *Tentorium semisuberites* (Schmidt 1870) were sampled by the French Remotely Operated Vehicle (ROV) Victor 6000, using Perspex<sup>TM</sup> push-cores (60 mm inner diameter) operated by the ROVs manipulator arm. Sediments with a virtually undisturbed surface and no protruding objects adjacent to the sponges were sampled to serve as controls (Figure 2). At each sampling point a pair of sediment cores (control and treatment, i.e. sediments with sponge) was taken. In total three pairs of sediment cores were sampled, at a distance of a few meters to each other (Figure 3a). The statistical model that guided our study was a randomised blocks design, with sampling sites as blocks (randomly chosen) and sponge and control cores as treatment.

To investigate small-scale distribution patterns of the nematodes, the uppermost 5 cm sediment-layers of the corer tubes were sub-sampled by means of small syringes (1.2 cm in diameter). From each corer tube sub-samples were taken at four positions around the sponge and below the sponge after removal. The sub-sampling scheme of the controls was similar to the sub-sampling of treatments (Figure 3b). Sub-samples were sliced into 1 cm layers and preserved in a 4% Formalin seawater solution. At the laboratory, the sediment layers were fractionated into five size-classes (500, 250, 125, 63, and 32 µm), which facilitates the separation of the nematodes from the sediment, and stained with Rose Bengal. For the determination of the nematodes to species level (or putative morphospecies), all individuals were prepared as permanent slides ([56,57] and citations therein). Identification and measurements (width and length) of each individual has been done using light microscopy (up to 100-times magnification, with Nomarski optic). By means of a video camera (3-CCD Hitachi HV-C20) mounted to the microscope, a digital image database with about 10.000 detailed photos from about 600 individuals has been set up. For the investigation of the nematode communities all nematodes have been sorted from the sediments of 15 control sub-samples and 12 sponge sub-samples.

In order to allow sub-sampling at various positions around the sponges it was necessary to localise the sponges exactly in the centre of the push-cores. A precise positioning of the push-cores with the manipulator arm of the ROV was not always possible; therefore three sub-samples from the sponge cores are missing (one of each sponge core).

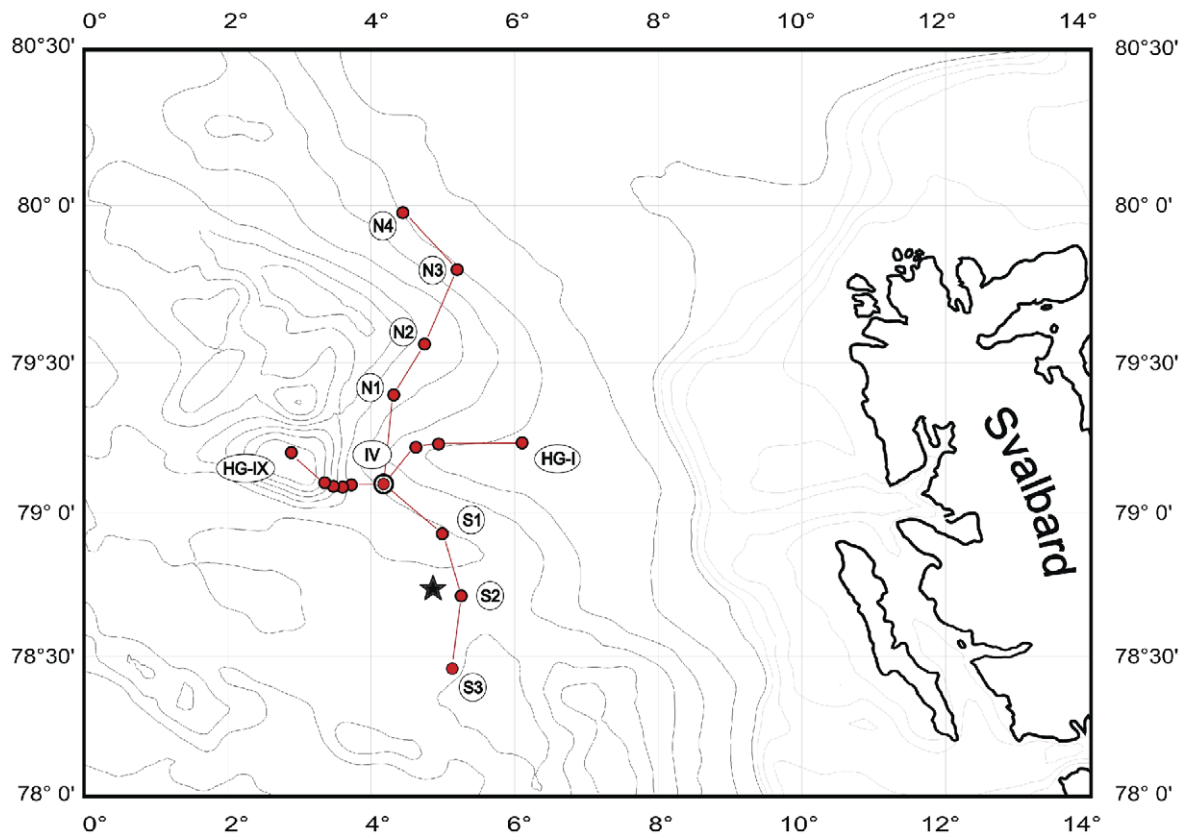

**Figure 1. Location of HAUSGARTEN observatory.** Bathymetric map of the HAUSGARTEN area with 16 permanent sampling sites (red dots). The star marks the sampling position of this study at 2300 m water depth. doi:10.1371/journal.pone.0029152.g001

### Diversity measures

To measure and compare biodiversity patterns of the nematodes, taxonomic composition and functional traits of the nematode species, indicated by functional groups are described as complements to diversity as number of species and their relative abundance. For the calculation of the different diversity measures of the nematode community only the uppermost sediment layers of the sub-samples from control and sponge cores were taken into account.

**Abundance-based diversity.** To estimate abundance-based diversity of the nematode community, univariate indices were computed such as number of species (S), diversity (Shannon-

Wiener index  $H'$  [58]), species richness ( $ES_{(n)}$  [59]) and evenness (Pielou's index  $J'$  [60]).

To test for differences in univariate diversity measures ( $J'$ ,  $ES_{(n)}$ ,  $H'$ ) between sampling sites (core pairs) and between treatments (control and sponge cores), we specified a nested design for the analysis of variance (nested ANOVA) with "Site" as random factor and "Site (Treatment)" as error term for the random factor "Site". To achieve a balanced sample size 12 sub-samples from the sponge cores and the corresponding 12 sub-samples from the control cores were included in the analysis. Prior to analyses, homogeneity of variances was assessed with Cochran's C test. Tukey HSD multiple comparison test was used for pairwise comparisons. All indices were calculated after formulas as stated in [61–64].

**Taxonomic diversity.** [65] developed a group of diversity indices, based on the relatedness of species. These measures were designed from species lists (e.g. from certain sampling sites) and they are based on the taxonomic distances through the taxonomic classification tree between every pair of individuals [66]. To describe taxonomic relationships between species within the nematode communities of the control and sponge cores the **Average Taxonomic Distinctness** ( $AvTD$ ,  $\Delta^+$ ) as a measure for the mean degree of relationship between the species, and the **Variation in Taxonomic Distinctness** ( $VarTD$ ,  $\Delta^+$ ) as a measure for the unevenness of the species distribution across the Linnean classification tree were calculated [65,66]. We used seven taxonomic levels (species, genus, family, suborder, order, subclass and class), according to the classification described by [67] with equal step-length between the levels. With these taxonomic

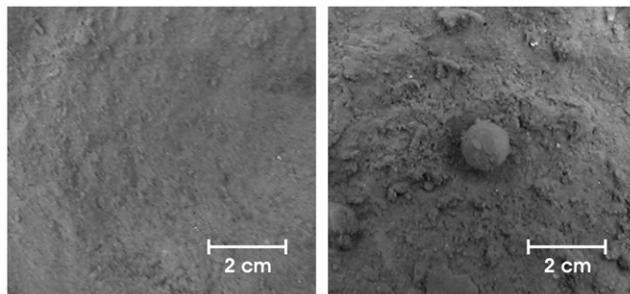

**Figure 2. Photograph of the sediment surface of two push-cores.** Control core (left picture) and sponge core with *Tentorium semisuberites* (right picture). doi:10.1371/journal.pone.0029152.g002

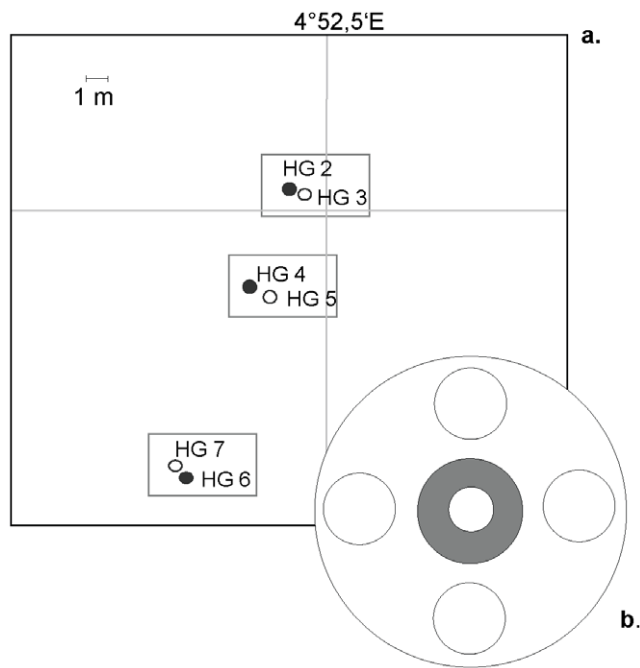

**Figure 3. Close-up of the sampling site and sub-sampling of the sediment cores.** (a.) Positions of the control cores (HG3, HG5, and HG7, open circles), and sponge cores (HG2, HG4, and HG6, closed circles). (b) Sub-sampling scheme of the sponge cores. Sub-sampling of the control cores corresponds to the sub-sampling scheme of the sponge cores.

doi:10.1371/journal.pone.0029152.g003

distinctness measures, data can be used in presence/absence form, and with different levels of sampling effort.

With the construction of taxonomic distinctness indices from species lists it is possible to test these indices for departure from expectation, based on a master taxonomy which comprises the stock of species in the region where the species were found at one locality [66,68]. This requires a master list or inventory of species within defined taxonomic boundaries [66,68]. The species composition of a sampled locality (observed diversity) can be compared with this master list (expected diversity). Discrepancies of observed values from expected values can be interpreted as loss or enhancement of diversity [66,69]. The indices  $\Delta^+$  and  $\Lambda^+$  are explained in detail in [66,68–70].

Calculations of AvTD and VarTD indices as well as the abundance-based diversity measures were done using the PRIMER DIVERSE routines [71].

**Functional diversity.** To estimate functional diversity of the nematode communities, organisms were divided into life-form types by means of the structure of buccal cavity, tail shape and body shape. These characteristics are linked to feeding strategy, locomotion mode, and mobility of the nematodes. These connectable criteria are considered as morphological adaptation to a given life-style.

The nematodes were classified into feeding types due to the structure of their buccal cavities according to [44]. Although the validity of this approach has been discussed in different studies [45,72–76], it remains an important and common tool to interpret the ecology of free-living nematode communities [43,77–82] and is therefore also used in the present study.

The classification in different feeding types according to [44] is based on four classes: Groups IA and IB describe selective and non-selective deposit feeders without teeth. Groups IIA and IIB

comprise epigrowth feeders as well as predators and omnivores with teeth (Table 1). The groups of deposit feeders (IA and IB) mainly consume bacteria and small-sized (IA) or larger-sized organic particles (IB). Epigrowth feeders (IIA) use their teeth to tap objects or scrap off surfaces for food. Predators and omnivores (IIB) also tap plant objects, but the most important feeding mode is predation or scavenging. They use their buccal armature to feed on nematodes or other small invertebrates.

Another functional classification of the nematode species is based on the great variety of tail shapes [47,48,83]. The shape of the tail has an influence on locomotion, foraging and reproduction and is used as another aspect of nematode morphology for classification into functional groups [47,43,84]. In the present study a modification of the tail-shape groups described by [47,48,83] is used to classify the nematodes. The tail-shape types have been related to five main classes with up to three subdivisions: rounded, short conical, short cylindrical, long conical and long cylindrical (Table 1). Nematodes of the first three groups with short tails are thought to have a mobile lifestyle, whereas long-tailed nematodes of the last two groups are less mobile or even hemisessile (cf. [85]).

Following [50,51], the ratio between body length and width is assumed to be a morphological adaptation to a given life-style (interstitial *vs.* burrowing). In nematode species descriptions, amongst others, an indication of the De Man ratio  $a$  is given, which is the ratio of the total body length to maximum body diameter [83]. This ratio provides a quantitative measure of the body shape [51,53]. In this study, a modified De Man ratio  $a$  (body length excluding filiform tails) is used by dividing the body length without tail by the body width. A small length/width ratio ( $l/w$  ratio) describes a plump body shape and a large  $l/w$  ratio means a more slender body shape. In line with examples for De Man ratio  $a$  given by [83], a total of five morphotypes based on different body shapes were distinguished (Table 1). The first two groups consist of nematodes with short and stout bodies. Group three to five comprise nematodes with long and slender bodies. Two important life-styles are separated by this grouping: burrowing species with short and stout bodies and interstitial species with long and slender bodies. According to [51], the long/thin body shape enables the nematodes to move swiftly through the sediment but may make them more vulnerable to predation. In contrast, nematodes meeting the stout morphotype may reduce this predation pressure, due to their greater width.

Each individual nematode could be described by a combination of morphological traits related to a functional feeding (**F**), tail (**T**) and body-shape (**B**) group. The nematodes were classified by these trait-combinations to functional **F\_T\_B** groups and assigned to a particular type of life-form. As these functional life-form types share certain morphological traits, the functional types were consistent with the guild concept [86,87]. This approach implies, that species within the same guild (respectively of the same life-form type), also occupy the same ecological niches [87]. Thus the number of life-form types state to the variety of the existing ecological niches [88]. With four different feeding types and five different tail and body shape types, respectively, a total of 100 combinations are possible, representing 100 different functional **F\_T\_B** groups to describe functional diversity of the nematode community.

There are no standardised measures for quantifying functional diversity [89], but a commonly used measure for functional diversity is the number of functional groups represented by the species of an assemblage ([90] and citations therein). The diversity measure **Functional Group Richness (FGR)** as expected number of ecological life-form types per

**Table 1.** Functional classification of the nematodes based on morphological traits concerning buccal cavity structure, tail and body shape.

| 1. Feeding types     | Feeding modus                                                                | Life-style             |
|----------------------|------------------------------------------------------------------------------|------------------------|
|                      | <i>buccal cavity structure</i>                                               |                        |
| <b>Group IA</b>      | selective deposit feeders                                                    | microvorous            |
|                      | <i>minute buccal cavity, without buccal armature</i>                         |                        |
| <b>Group IB</b>      | none-selective deposit feeders                                               | ↓                      |
|                      | <i>various, bigger buccal cavity, without teeth or other buccal armature</i> |                        |
| <b>Group IIA</b>     | epigrowth feeders                                                            | ↓                      |
|                      | <i>minute to medium-sized buccal cavity, small teeth</i>                     |                        |
| <b>Group IIB</b>     | predators & omnivores                                                        | carnivorous/omnivorous |
|                      | <i>large buccal cavity, solid teeth</i>                                      |                        |
| 2. Tail-shape groups | Tail shape                                                                   |                        |
| <b>Group I</b>       | rounded                                                                      | mobile                 |
| <b>Group II</b>      | short conical                                                                | ↓                      |
| <b>Group III</b>     | short cylindrical                                                            | ↓                      |
|                      | <i>a. cylindrical</i>                                                        |                        |
|                      | <i>b. cylindrical, with swollen tip</i>                                      |                        |
| <b>Group IV</b>      | long conical                                                                 | ↓                      |
|                      | <i>a. conical</i>                                                            |                        |
|                      | <i>b. conical, pointed</i>                                                   |                        |
| <b>Group V</b>       | long cylindrical                                                             | hemisessile            |
|                      | <i>a. cylindrical</i>                                                        |                        |
|                      | <i>b. elongated</i>                                                          |                        |
|                      | <i>c. filiform</i>                                                           |                        |
| 3. Body-shape groups | Body shape                                                                   |                        |
|                      | <i>l/w ratio</i>                                                             |                        |
| <b>Group I</b>       | stout                                                                        | burrowing              |
|                      | <i>0–10</i>                                                                  |                        |
| <b>Group II</b>      | plump                                                                        | ↓                      |
|                      | <i>11–20</i>                                                                 |                        |
| <b>Group III</b>     | thin                                                                         | ↓                      |
|                      | <i>21–40</i>                                                                 |                        |
| <b>Group IV</b>      | slender                                                                      | ↓                      |
|                      | <i>41–80</i>                                                                 |                        |
| <b>Group V</b>       | filiform                                                                     | interstitial           |
|                      | <i>81–160</i>                                                                |                        |

1. Feeding types according to Wieser (1953) based on buccal cavity structure.

2. Tail-shape groups (I–V) based on variety of tail shapes.

3. Body-shape groups (I–V) based on body length and body width ratio (l/w-ratio).

doi:10.1371/journal.pone.0029152.t001

species number was also used in this study. Some species occur in more than one life-form type (mainly because of their varying body width/length ratio). Therefore the number of “functional” species per core could be higher than the number of “taxonomical” species per core.

Shannon-Wiener diversity ( $H'$ ) and evenness ( $J'$ ) were calculated as univariate measures of functional diversity of the nematode community. As additional information about the variability of the distribution of the life-form types, the Coefficient of Variation (CV), expressed as ratio between standard deviation (SD) and mean ( $\bar{x}$ ) [91], was calculated for the functional structure of the nematode community.

The diversity measures for functional diversity were analysed using a randomised complete block analysis, with factors block “sampling site” (randomly chosen) and treatment “sponge/control core”. The response variable was diversity per core. The null hypothesis ( $H_0$ ) was that there are no differences in diversity between sponge and control samples per core, pooling across all possible blocks.

**Life history strategy.** According to [92–94], marine nematode taxa can be placed on an arbitrary c-p scale ranging from 1 for “colonisers” to 5 for “persisters”. Genera classified as colonisers have short live-cycles, high reproduction rates, high colonisation ability and are tolerant against various types of



disturbance (r-strategist *sensu lato*). Genera classified as persisters have comparably long life-cycles, low colonisation ability, few offsprings and are more sensitive to disturbance (K-strategists *sensu lato*).

## Results

### Community structure

About 5800 nematodes were found in the sub-samples from control and sponge cores (0–5 cm sediment depth), corresponding to a mean density of 1467 ind./10 cm<sup>2</sup>. A total of 367 species were distributed over 92 genera and 31 families. 50% of all individuals were equally proportioned by three major groups. These were the family Desmoscolecidae with the genus *Desmoscolex*, Microlaimidae with the genus *Microlaimus*, and Monhysteridae with the genus *Thalassomonhystera* (see also Table S1).

Most of the nematodes were distributed in quite low densities over a multiplicity of species (high values of diversity  $H'(\log_2)$  and  $ES_{(100)}$ , Table 2). The high evenness values for the species distribution indicated that none of the species showed a clear dominance within the nematode community. The high diversity rather reflected the large number of families and genera than a high diversity within the families and genera. Most of the nematode families consisted of few genera ( $\leq 8$ ), 40% of the families were monogeneric. 92% of all genera were represented by less than 10 species; ca. 50% of the genera were monospecific. About a fifth of all families, genera and species were represented each by a single individual.

### Abundance-based diversity

The diversity indices, calculated for the upper sediment layer of the control and sponge cores, showed higher values for the nematode communities from sponge cores than from control cores, except for species number of the core pair HG6/HG7. This core pair showed in fact the lowest values for the diversity indices (Table 1).

For the abundance-based diversity measures  $ES_{(100)}$  and  $H'(\log_2)$ , results from the nested ANOVA with site as random factor showed significant differences ( $p=0.022$  and  $0.039$ , respectively) between treatments nested within site from control and sponge cores. Species richness and Shannon-Wiener diversity of the sponge cores were significantly higher than in the control samples (Table 3). Evenness, however, showed no significant differences ( $p=0.107$ ) between control and sponge cores.

**Table 2.** Results of the diversity indices for the nematode communities in the sponge (HG2, HG4, HG6) and control cores (HG3, HG5, HG7) (0–1 cm sediment depth).

| Diversity indices              |           |           |           |
|--------------------------------|-----------|-----------|-----------|
| Sponge/Control core            | HG2/HG3   | HG4/HG5   | HG6/HG7   |
| <b>S</b>                       | 126/105   | 158/138   | 104/129   |
| <b>J'</b>                      | 0.90/0.90 | 0.90/0.89 | 0.85/0.81 |
| <b><math>ES_{(100)}</math></b> | 60/59     | 63/58     | 51/49     |
| <b><math>H'(\log_2)</math></b> | 6.29/6.05 | 6.59/6.30 | 5.71/5.65 |

S: number of species, J': Pielou's index of evenness,  $ES_{(100)}$ : expected number of species/100 individuals,  $H'(\log_2)$ : Shannon-Wiener diversity index.  
doi:10.1371/journal.pone.0029152.t002

**Table 3.** Nested ANOVA analysis of differences in diversity indices (0–1 cm sediment depth) between sampling sites (Site) and control and sponge samples (Treatment).

|                                | Source           | SS      | df | MS      | F     | P            | Error term       |
|--------------------------------|------------------|---------|----|---------|-------|--------------|------------------|
| <b>J'</b>                      | Site             | 0.005   | 2  | 0.003   | 2.837 | 0.203        | Site (Treatment) |
|                                | Site (Treatment) | 0.003   | 3  | 0.001   | 2.70  | 0.107        | Residual         |
|                                | Residual         | 0.012   | 12 | 0.001   |       |              |                  |
| <b><math>ES_{(100)}</math></b> | Site             | 787.836 | 2  | 393.918 | 1.996 | 0.281        | Site (Treatment) |
|                                | Site (Treatment) | 592.150 | 3  | 197.380 | 4.652 | <b>0.022</b> | Residual         |
|                                | Residual         | 509.130 | 12 | 42.430  |       |              |                  |
| <b><math>H'(\log_2)</math></b> | Site             | 1.471   | 2  | 0.735   | 2.397 | 0.239        | Site (Treatment) |
|                                | Site (Treatment) | 0.920   | 3  | 0.307   | 3.840 | <b>0.039</b> | Residual         |
|                                | Residual         | 0.959   | 12 | 0.080   |       |              |                  |

Bold values indicate significant differences at  $p<0.05$ .

doi:10.1371/journal.pone.0029152.t003

### Taxonomic diversity

Table 4 outlines the results for the taxonomic diversity of the nematode communities from control and sponge cores. All samples tended to show reduced values for taxonomic distinctness. However, control cores (HG3, HG5, and HG7) predominantly showed lower values than expected from the master list for taxonomic variance, whereas the sponge cores (HG2, HG4, and HG6) rather showed increased variance values. All values for the taxonomic variance of the nematode community around the sponges were higher than expected. Increased variance values indicated a more uneven distribution of the species from the sponge cores across the taxonomic tree (cf. [66,68–70]). A few genera became highly species-rich whilst a range of other genera were represented by only one or very few species.

### Functional diversity

In total 52 out of 100 possible trait combinations or functional F\_T\_B groups, respectively, were found within the nematode community of this study. The nematode communities were dominated by four different ecological life-form types: small non-selective deposit feeders with a mobile, interstitial life-style; small non-selective deposit feeders with a less mobile, interstitial life-style; medium-sized selective deposit feeders with a mobile, burrowing life-style; large epigrowth feeders with a less mobile, burrowing life-style. The first trait combination dominated the sponge core HG2 (11%) and the second combination the corresponding control core HG3 (15%). These two trait combinations were the most genera-rich. 30 genera mainly belonging to the xyalids shared the first trait combination while a total of 16 mainly diplopeltid genera shared the second combination. The third trait combination dominated the core pair HG4/HG5 having 15% share each. This trait combination was mainly represented by the desmoscolecid genera *Tricoma* and *Desmoscolex*. The last trait combination dominated the sponge core HG6 with 16% and the corresponding control core HG7 with 22%. This trait combination was only represented by the microlaimid genus *Microlaimus*.

**Table 4.** Taxonomic diversity indices and species number of the nematode communities from control and sponge cores (0–1 cm sediment depth).

| Community                      | Number of species per core | Average taxonomic distinctness ( $\Delta^+$ ) | Variation in taxonomic distinctness ( $\Delta^+$ ) |
|--------------------------------|----------------------------|-----------------------------------------------|----------------------------------------------------|
| Control cores (15 sub-samples) | 219                        |                                               |                                                    |
| HG3 (5 sub-samples)            | 105                        | 68.89 ( <b>l</b> )                            | 427.59 ( <b>l</b> )                                |
| HG5 (5 sub-samples)            | 138                        | 72.48 (exp)                                   | 473.72 (exp)                                       |
| HG7 (5 sub-samples)            | 129                        | 70.64 ( <b>l</b> )                            | 439.61 ( <b>l</b> )                                |
| Sponge cores (12 sub-samples)  | 214                        |                                               |                                                    |
| HG2 (4 sub-samples)            | 126                        | 71.54 ( <b>l</b> )                            | 461.28 ( <b>h</b> )                                |
| HG4 (4 sub-samples)            | 159                        | 70.83 ( <b>l</b> )                            | 480.23 ( <b>h</b> )                                |
| HG6 (4 sub-samples)            | 106                        | 71.95 (exp)                                   | 555.02 ( <b>h</b> )                                |

l = lower than expected; exp = as expected; h = higher than expected.

**In bold abbreviations:** index is significantly higher or lower than expected (95% significance level).

doi:10.1371/journal.pone.0029152.t004

Highest numbers of ecological life-form types were found within the nematode community of the core pair HG4/HG5. Functional diversity ( $FGR_{(100)}$ ) and Shannon-Wiener diversity  $H'(\log_2)$  in HG4/HG5 were also found to be higher than for the remaining core pairs (Table 5). Functional evenness  $J'$ , however, showed highest values for the core pair HG2/HG3. In contrast, highest values for the CV were found for the nematode community of core pair HG6/HG7.

Comparing functional diversity ( $FGR_{(100)}$ ) and Shannon-Wiener diversity  $H'(\log_2)$  between sponge and control core of each core pair, values for the sponge core were equal to or higher than for the corresponding control core. Functional evenness ( $J'$ ) showed no clear trend. Control and sponge core of the pair HG4/HG5 showed the same values for evenness, whereas evenness of the remaining two core pairs was in one instance higher for the sponge core (HG2) and in one instance higher for the control core (HG7). CV-values of the sponge cores were always higher than for the controls.

At a 10% significance level, functional diversity  $FGR_{(100)}$  ( $df=1$ ;  $F=4.566$ ,  $p=0.0501$ ) and Shannon-Wiener diversity  $H'(\log_2)$  ( $df=1$ ;  $F=3.373$ ,  $p=0.0637$ ) of the sponge cores were higher than for control cores. All other functional diversity measures as well as the coefficient of variation showed no significant differences between control and sponge cores (neither at a 5% nor at a 10%

significance level). There were no effects of blocks (sampling sites) although given the random blocks, except for the evenness ( $J'$ ;  $df=2$ ;  $F=4.92$ ,  $p=0.0240$ ).

The sponge-associated sediments were dominated by colonisers (c-p value of 2), whereas more K-selected genera (c-p values of 3 and 4) prevailed the control sediments (Table 6). The percentage of nematode species whose individuals occur in more than one functional group was higher in the sponge-associated sediments (53%) than in the control sediments (37%, Table 7).

## Relationship between species diversity and functional diversity

Abundance-based species richness was related to functional diversity as life-form richness. The number of ecological life-forms increased with increasing species number for control and sponge sub-samples (Figure 4). The species richness and life-form richness relationship revealed a linear increase for the nematode community from control samples ( $R^2=0.9101$ ). In the sponge cores species richness and life-form richness were related to a lower degree, expressed by a lower coefficient of determination ( $R^2=0.5618$ ). Beyond a certain level, increasing species numbers had no effect on the increase of life-form types. Altogether, life-form types of the nematode community from sponge samples comprised a higher number of species than from the controls.

## Discussion

### Data Quality

Ideally, sample size and number of sampling units should be optimised not only in relation to body size and quantitative

**Table 5.** Univariate diversity measures and coefficient of variation for the ecological life-form types of control and sponge cores (0–1 cm sediment depth).

| Sediment cores | S  | N   | $J'$ | $FGR_{(100)}$ | $H'(\log_2)$ | CV   |
|----------------|----|-----|------|---------------|--------------|------|
| HG2            | 31 | 162 | 0.89 | 28            | 4.43         | 0.23 |
| HG3            | 26 | 117 | 0.88 | 25            | 4.11         | 0.14 |
| HG4            | 36 | 199 | 0.85 | 29            | 4.39         | 0.36 |
| HG5            | 31 | 142 | 0.85 | 28            | 4.21         | 0.23 |
| HG6            | 31 | 129 | 0.86 | 29            | 4.28         | 0.62 |
| HG7            | 28 | 131 | 0.89 | 26            | 4.28         | 0.27 |

S = number life-form types per core, N = number of functional species per core,  $J'$ : Pielou equitability index,  $FGR_{(100)}$ : expected number life-form types per 100 functional species,  $H'(\log_2)$ : Shannon-Wiener diversity index, CV = coefficient of variation.

doi:10.1371/journal.pone.0029152.t005

**Table 6.** Percentage of nematodes in life history categories (c-p values) in control and sponge samples (0–1 cm sediment depth).

| c-p Value | Control | Sponge |
|-----------|---------|--------|
| c-p 2     | 39.8%   | 51.5%  |
| c-p 3     | 20.6%   | 21.4%  |
| c-p 4     | 39.4%   | 28.2%  |

c-p 2 = general opportunists, c-p 3 = more K-selected genera, c-p 4 = persisters.  
doi:10.1371/journal.pone.0029152.t006

**Table 7.** Percentage of species of control and sponge samples whose individuals are distributed over a different number of functional groups (0–1 cm sediment depth).

| Number of functional groups per species | % Species |        |
|-----------------------------------------|-----------|--------|
|                                         | Control   | Sponge |
| 1                                       | 63        | 47     |
| 2                                       | 33        | 37     |
| 3                                       | 4         | 12     |
| 4                                       | -         | 4      |

doi:10.1371/journal.pone.0029152.t007

abundance of the fauna but in particular to the statistical sampling design. However, in the deep sea benthic sampling is more costly, and time consuming, and technically more difficult than to obtain samples from shallower waters. Replicate or multipoint sampling over a small area, although statistically desirable, is therefore only rarely accomplished. Despite the above mentioned difficulties in sampling the deep sea and as a result of the targeted sampling that

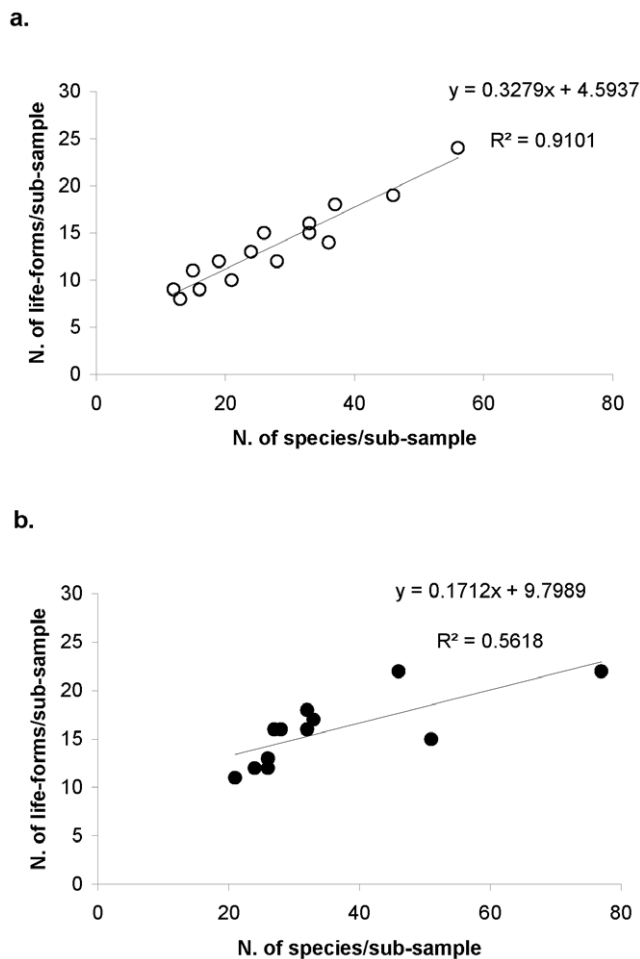

**Figure 4.** Relationship between functional diversity and species richness within the nematode communities. (a) control and (b) sponge samples (sediment-depth 0–1 cm).  $R^2$  for a linear relationship. Results of regression: a. no. of cases: 15;  $p < 0.001$ ;  $df = 1.13$ ; b. no. of cases: 12;  $p = 0.005$ ;  $df = 1.10$ . doi:10.1371/journal.pone.0029152.g004

could only be achieved by using a ROV, we were able to obtain a sufficient set of samples which allows an accurate resolution of the nematode community patterns.

### Abundance-based Diversity

Habitat heterogeneity has been shown to modify benthic community characteristics like abundance, richness and diversity. According to [95] the majority of empirical studies find a positive relationship between habitat complexity and species diversity [96–100] (but see [101]). Heterogeneous environments are predicted to support more complex and diverse biological assemblages [102,17]. In a competitive environment, spatial heterogeneity provides an additional axis, along which species can differ. This increases the possibility of species coexistence. The permanent heterogeneous environment around the sponges (see Figure 2) should rather promote the coexistence of many species than the dominance of particular species (cf. [103]). Whereas in a heterogeneous environment a community is composed by many different species in low individual densities, in homogeneous environments the community is dominated by less species in high density of the individuals (cf. [104,105]). Against this backdrop it is expected that the community structure of the nematode assemblages is characterised by different species dominance patterns in the control samples and sponge samples, where higher diversities (species number and richness, evenness and Shannon-Wiener diversity) in the heterogeneous sediments around the sponges have been found. Control and sponge cores differ significantly in the diversity measures  $ES_{(100)}$  and  $H'(\log_2)$ ; these parameters are, however, interdependent. Regarding the uncorrelated parameters  $ES_{(100)}$  and  $J'$ , no significant differences between the data collectives could be seen for the evenness, although evenness was higher in sponge than in control samples.

The diversity patterns of the nematode communities suggest that the abundance-occupancy relationship (relationship between density of individuals and distribution of nematode species) is related to the different environmental conditions and to the effects of different interspecific interactions in control sediments and around the sponges.

The partly significant different community structure in control and sponge samples in terms of diversity patterns described by the abundance-based measures merely displays a trend and can not be explained by a single mechanism (such as the Carrying Capacity Hypothesis [106], or the Aggregation Model of Coexistence [107]). Presumably, the underlying processes are insufficiently described by the traditional diversity indices alone, as they do not take into account the distances or differences between species or their trait dissimilarities. Taxonomic and/or functional diversity measures are more reliable community descriptors here as they drive more resp. additional information about the nematode community characteristics.

Although abundance-based diversity measures can easily be criticised on the grounds that they do not account for phylogenetic, taxonomic, and functional variability among species and are heavily dependent on sample size/effort, they are simple and intuitively sensible measures of species diversity.

### Taxonomic diversity

Describing the nematode community by taxonomic diversity leads to the following questions: “Do competing species need to be different in order to have a stable coexistence?” [108] and “Is there a limit to the similarity of coexisting species?” [109].

The coexistence of similar species often is interpreted by similar distribution patterns due to shared habitat requirements (similar fundamental niches, cf. [88,110–112]). In the real world, however,



no square centimetre of ground is exactly the same as the next and environmental conditions are subject to temporal variability [109]. Any force that interrupts the process of competitive exclusion may prevent extinction and enhance diversity [109].

Our comparison of sponge associated nematode assemblages with those from adjacent control sediments revealed that sub-samples from controls as well as from sponge cores tended to show low to expected values for taxonomic distinctness (AvTD). However, the control samples predominantly showed low values for taxonomic variance (VarTD), whereas sub-samples from sponge cores showed higher than expected variance values.

Obviously, coexistence of taxonomically similar species is promoted in the control cores, whereas more dissimilar species coexist in the sponge cores. More heterogeneous habitat conditions of the sediments around the sponges might operate as a force that interrupts the process of competitive exclusion and thus causes higher taxonomic variability and species richness of the sponge cores. Restricted available resources would have a stronger limiting effect on the control than on the sponge-associated communities and would cause a nematode community with reduced species richness in connection with a lower taxonomic variability.

Coexistence of the species within the sponge cores mainly depends on the response of the species to the heterogeneous environment. Thus the interactions between the species might be conditioned by the extent of ecological requirements overlap (or not overlap) along the relevant environmental parameters. This could lead to a negative correlation of taxonomic similarity and local coexistence within the sponge cores. The biogenic structure “sponge” creates a heterogeneous environment on a local scale compared to the regional level. On local scale, (taxonomically) similar competitors (low or rather expected AvTD-values) are being affected differently by the heterogeneous environment within the sponge cores, which is expressed by a more variable distribution of the nematode species across the genera (increased VarTD-values).

Compared to the regional level, species within the nematode community of the control cores tended to show a more even or rather expected distribution across the genera. This lower taxonomic variability could be determined by similar requirements concerning the same potentially limited resources. Local coexistence of species might be favoured, if species differ sufficiently in their relative effects (impact vector) as long as they do not differ too much in their relative response to the environmental conditions [113].

**Are low AvTD values together with enhanced VarTD values characteristic for deep-sea nematode communities?** Provided that the taxonomic structure of the nematode community from the HAUSGARTEN area represents a composition, where species are distributed over various families (here: 31) but few orders (here: four), increased taxonomic variance indicates an uneven species distribution over genera. As all species of the nematode community belong to the same class, the greatest taxonomic differences between the species of the control and sponge cores occur on a low taxonomic level (family resp. genera level). Results from different studies show that deep-sea nematodes are usually distributed over rather a few characteristic genera, whereas the species distribution hardly overlaps [46,114–118]. Taxonomic differences within deep-sea communities would predominantly appear on a low taxonomic level along with increased VarTD-values. Low AvTD values would be characteristic for these communities and may be a general feature of nematode communities from the deep sea.

An expected level of average taxonomic differences along with increased taxonomic variance of these nematode communities will,

in contrast to what has been found by [68], not necessarily be a consequence of reduced habitat heterogeneity. Varying VarTD-values of the HAUSGARTEN nematode community more likely reflect the heterogeneity resp. homogeneity of environmental conditions, and therefore the extent of small-scale habitat heterogeneity. Results provided by [119] indicate that environmental variability has a stronger effect on the variation in taxonomic distinctness of a community than on the average taxonomic distinctness. The communities investigated by [119] show high VarTD values with variable environmental conditions and low VarTD values combined with reduced environmental variability (but see also [120]). The increased VarTD values of the nematode community from the sponge cores therefore could be interpreted as response to the more diverse habitat conditions of the sediments in the surroundings of the sponges, whereas the decreased taxonomic variance of the controls nematode community reflects more homogeneous habitat conditions of the control sediments.

In contrast to the abundance-based diversity measures, which treat all species as equivalent in value in their contribution to diversity, taxonomic distinctness measures quantify diversity as taxonomic relatedness of the species within a community, and thereby describe another dimension of diversity [121]. The fact that taxonomic distinctness measures are statistically independent of sampling effort [122] makes them attractive tools for investigating the structural complexity of an ecological community [123]. Finally, the question about (taxonomic) differences between species is not the only approach to understanding the coexistence of species under different environmental conditions. Species that are closely related evolutionarily are not necessarily morphologically or functionally similar [124]. After all, the key to understand the community structure of the nematodes is the knowledge how species coexist or to be more specific, which kind of niche differences exists and to what extent do niche differences occur within the control and sponge cores.

The taxonomic diversity measures demonstrated differences between the species of the nematode communities around the sponges and in the control sediments and they show that these differences are variable, but they do not define the character of these differences (cf. [125,126]).

## Functional diversity

Ecologists have used a variety of ways to define functional groups but there is no universal functional type classification for species in an ecosystem or a community. This applies especially to the classification of marine benthic invertebrates [127]. Functional classification depends on the objective of the investigation, the spatial scale (local to global), and the observed ecosystem processes or environmental factors [127,128]. Therefore functional groups are arbitrary classifications within a comparative continuous characteristic space, like most categories used to simplify the real world.

The functional groups used to describe the HAUSGARTEN nematode community were consistent with the guild concept [86,87]. Species within the same guild respectively of the same life-form type, also occupy the same ecological niches [87]. Thus the number of life-form types is an indication for the variety of the niches offered by an ecosystem [88].

Functional classification often has two distinct goals: (1) to investigate the response of species to environmental changes such as food or resource availability (functional response groups), and (2) to study the effect of species on properties of an ecosystem or community structures such as stability, resource dynamics or productivity (functional effect groups; [129,130]). The nematode

species of the southern HAUSGARTEN area have been classified into feeding types, tail-shape and body-shape groups as functional response groups. The combined functional approach to classify the nematode species into life-form types by means of F\_T\_B groups in contrast reflects functional effect groups. As a result hierarchical classification of the feeding types, tail-shape and body-shape groups has been performed [131].

The determined life-form types in connection with species richness of the nematode community were examined under aspects of functional redundancy (Redundant Species Hypothesis). The Insurance Hypothesis is closely associated with the concept of functional redundancy [132]. The higher the variance of the functional effect groups of a community, the less species are necessary (as lower species richness) to buffer an ecosystem [128]. Functional richness (as interspecific variance of responses to the environment) should contribute to the insurance effect, since higher functional richness increases the chance that at least some species respond differently to variable environmental conditions or disturbances [128]. Although species of a functional effect group should show by definition at least some degree of redundancy, they might respond differently to changes in the environment [128]. Thus, different functional response types nested within a functional effect group might be important in sustaining (long-term) functioning of an ecosystem [133–135]. Nonetheless, questions about the extent to which results from these terrestrial concepts can be extrapolated to the deep water still remain (cf. discussion in [136–139]).

**Functioning of the nematode community from control and sponge cores.** Diversity values for the functional structure of the nematode community only show differences at a 10% level between the communities of the control and sponge cores. Together with the higher CV values for the sponge communities, this might nevertheless be an indication not only for a higher functional diversity, but also for a higher functional divergence within the sponge-associated nematode community. Higher functional divergence induces a higher degree of niche partitioning and therewith a lower degree of resource competition. There is a high probability that a more efficient resource utilisation could cause a higher ecological community function within the sponge cores.

The relationship between species richness and functional diversity differs in the nematode communities from control and sponge samples. This relationship is linear within the control sediments: the higher the species richness, the greater the functional diversity (as number of functional groups). In contrast, the correlation between number of species and number of functional groups appears to be weaker with a lower slope within the community from sponge samples. This could be an indication that under homogeneous environmental conditions functional niches of the species do not overlap or rather less strong (control cores) than under heterogeneous environmental conditions, where niches of the species seem to overlap more broadly (sponge cores). These differences imply that for the community function of the sponge cores the species identity effect is less important than the functional identity of the species compared to control cores. The functional habitat structure of the sponge-associated sediments seems to favour a community in which diversity was not so much determined by the number of species but by the coexistence of individual species as well as their interactions. Increasing species richness was becoming possible due to a stronger differentiation of the available niche space. By contrast in the control cores an increase of species richness depends on the variety of ecological niches and was, therefore, related to an increasing functional diversity.

The extent to which certain communities are built by either functionally redundant or different species depends not only on species richness, but also on the abundance of opportunistic and conservative species (generalist or specialist species) within the functional groups [140]. The nematode community of the control cores is predominantly composed by conservative species or specialists, whereas within the sponge cores the portion of opportunistic genera or generalists is higher. The species of the sponge cores are more able to expand beyond their realised niches (cf. [141]) and the capability of functional compensation (e.g. loss of species) is higher than that of the control cores (cf. [142]).

Compared to the sponge-associated nematode community, the community of the controls is defined by a lower number of functional groups and number of species within the functional groups along with a lower rate of species, whose certain individuals occur in more than one functional group. This is an indication that under the more homogeneous environment of the control sediments less (functional) niche space is available. The functional niches are narrower but more different, and there is less empty niche space. This could mean that less interaction takes place between the species of the control cores.

Changing environmental conditions (e.g. by disturbance or resources availability) would then probably be associated with changes in diversity and subsequently result in changes of the ecological community function (if changes of species richness also result in changes of functional diversity). Communities with weak species interactions might show a positive relationship between species diversity and extent of ecological function (cf. [140]). Species loss could not be compensated for by the remaining species and would represent the loss of a functional group, which subsequently could have a major impact on ecological processes within the community (cf. [143] and citations therein).

By contrast, overall more functional groups occur within the sponge cores. The particular functional groups contain more species and the portion of species, whose individuals occur in more than one functional group, is higher in the sponge cores compared to the control cores. This is a further indication that the heterogeneous environmental conditions in the sponge-associated sediments are quite likely to provide a larger functional niche space and niche overlapping is thus stronger than in the control cores.

Changing environmental conditions could probably be compensated by the nematode community from sponge cores without changes in diversity or variance in diversity would at most be damped (cf. [144] and citations therein). The stronger interaction between the species of the sponge-associated community could lead to intensified interspecific competition. Reduced abundance of particular species would lead to competitive release and could be compensated for by higher abundances of other species [144–147]. This negative feedback between species reduces not only the variance of total abundance within the community but also the variability in the ecological function of the community as a whole [140,143]. Nevertheless, reduced biodiversity would have a negative effect on the Natural Insurance Capital [148] of the nematode community from sponge cores and thus, also a negative effect on the potential for functional compensation within the nematode community. There is a high probability that the function of the sponge-associated nematode community depends more strongly on biodiversity than the community of the control cores.

Results for functional diversity showed a higher level of ecological function within the nematode community from the sponge cores (higher functional diversity and more interaction between the species) compared to control cores. As long as the

degree of environmental heterogeneity does not reach a point where the individuals of different species no longer interact, these mechanisms cause a certain redundancy within the functional groups.

Functional diversity is an important and rather complex component of biodiversity, yet in comparison to taxonomic diversity, methods of quantifying functional diversity are less well developed [89]. When used as a measure of functional diversity, species richness implicitly assumes that all species are equally different (addition of any species to a community will increase functional diversity by one unit) and that the contribution of each species to functional diversity is independent of species richness [149]. Functional group richness also has limitations. One significant disadvantage is perhaps the largely arbitrary decision about the extent at which differences are excluded [85,150]. It assumes that species within groups are functionally identical [142] and that all pairs of species drawn from different functional groups are equally different. As a consequence we produced a classification based on different functional traits to minimise the loss of information.

A combination of multiple disequilibrium processes and mechanisms, interacting in complex ways, affects the nematode community structure in different ways in control and sponge-associated sediments. Under the rather homogeneous environmental conditions of the control sediments species diversity is associated with an increase of ecological different groups. However, the number of species and the functional richness is lower than under comparably heterogeneous environmental conditions of sponge-associated sediments.

In deep-sea environments spatial (and temporal) heterogeneity persists on a smaller spatial scale and over longer time periods than in comparable shallow water environments (e.g. [16,151,152]). Lower production rates and slower population growth rates than in comparable shallow water habitats lead to a certain competitive similarity of the species and contribute to extend time periods for

competitive exclusion. Based on these assumptions there is a high probability that environmental heterogeneity on small spatial scales plays a more important role in maintaining diversity of the communities than productivity and competitive exclusion [136].

Comparing the different approaches to describe diversity, we demonstrated that at least for local scale studies the traditional species-level approach alone is less conclusive. Although our examination of the nematode communities from control and sponge-associated sediments is only a snapshot, our findings show that more emphasis should be placed on the various aspects of diversity (e.g. as physiological, morphological, behavior related and other traits which are represented by the species of a community), to evaluate the effects of diversity on community or ecosystem functioning and to identify the underlying mechanisms and processes on a spatial (and temporal) scale.

## Supporting Information

**Table S1** Nematode genera and families identified in control and sponge samples (mean values including standard deviation, 0–5 cm sediment depth) and their functional classification. (DOC)

## Acknowledgments

We thank the operational team of the Remotely Operated Vehicle ‘Victor 6000’ (IFREMER/GENAVIR) and the crew of RV ‘L’Atalante’ for their helpful support during the expedition. We gratefully acknowledge Wolf E. Arntz and Almuth Börgen for constructive comments that improved the manuscript. This is publication ‘awi-n 23470’ of the Alfred Wegener Institute for Polar and Marine Research.

## Author Contributions

Conceived and designed the experiments: TS. Performed the experiments: TS. Analyzed the data: CH. Contributed reagents/materials/analysis tools: CH. Wrote the paper: CH.

## References

- Rex MA, Etter RJ (2010) Deep-Sea Biodiversity: Pattern and Scale. Cambridge: Harvard University Press. 354 p.
- Rex MA, McClain CR, Johnson NA, Etter RJ, Allen JA, et al. (2005) A source-sink hypothesis for abyssal biodiversity. *Am Nat* 165: 163–178.
- Macpherson E (2003) Species range size distribution for some marine taxa in the Atlantic Ocean. Effect of latitude and depth. *Biol J Linn Soc* 80: 437–455.
- Fortes RR, Absalão RS (2010) The latitudinal and bathymetric ranges of marine fishes: a global analysis to test the application of Rapoport’s Rule. *Mar Ecol* 31: 483–493.
- Gage JD (1996) Why are there so many species in deep-sea sediments? *J Exp Mar Biol Ecol* 200: 257–286.
- Thistle D, Levin LA, Gooday AJ, Pfannkuche O, Lamshead PJD (1999) Physical reworking by near bottom flow alters the metazoan meiofauna of Fieberling Guyot (northeast Pacific). *Deep Sea Res I* 46: 2041–2052.
- Sanders HL (1968) Marine benthic diversity: a comparative study. *Am Nat* 102: 243–282.
- Rex MA (1973) Deep-sea species diversity: decreased gastropod diversity at abyssal depths. *Science* 181: 1051–1053.
- Jumars PA, Gallagher ED (1982) Deep-sea community structure: three plays on the benthic proscenium. In: Ernst WG, Mroin J, eds. *Ecosystem Processes in the Deep Ocean*. New York: Prentice-Hall, Englewood Cliffs. pp 217–255.
- Gage JD, Tyler PA (1991) Deep-Sea Biology. Cambridge: Cambridge University Press. 504 p.
- Boucher G, Lamshead PJD (1995) Ecological biodiversity of marine nematodes in samples from temperate, tropical, and deep-sea regions. *Conserv Biol* 9: 1594–1604.
- Danovaro R, Gambi C, Dell’Anno A, Corinaldesi C, Fraschetti S, et al. (2008) Exponential decline of deep-sea ecosystem functioning linked to benthic biodiversity loss. *Curr Biol* 18: 1–8.
- Connell JH (1978) Diversity in tropical rain forests and coral reefs. *Science* 199: 1302–1310.
- Grassle JF (1989) Species diversity in deep-sea communities. *Trends Ecol Evol* 4: 12–15.
- Huston MA (1979) A general hypothesis of species diversity. *Am Nat* 113: 81–101.
- Etter RJ, Mullineaux LS (2001) Deep-sea communities. In: Bertness MD, Gaines S, Hay ME, eds. *Marine Community Ecology*. Massachusetts: Sinauer Associates, Inc., Publishers Sunderland. pp 367–393.
- Buhl-Mortensen L, Vannreusel A, Gooday AJ, Levin LA, Priede IG, et al. (2010) Biological structures as a source of habitat heterogeneity and biodiversity on the deep ocean margins. *Mar Ecol* 31(1): 21–50.
- Bell SS, Watzin MC, Coull BC (1978) Biogenic structure and its effect on the spatial heterogeneity of meiofauna in a salt marsh. *J Exp Mar Biol Ecol* 35: 99–107.
- Thistle D (1983) The role of biologically produced habitat heterogeneity in deep-sea diversity maintenance. *Deep-Sea Res* 30(12a): 1235–1245.
- Eckman JF (1985) Flow disruption by an animal-tube mimic affects sediment bacteria colonization. *J Mar Res* 43: 419–435.
- Aller JY, Aller RC (1986) Evidence for localised enhancement of biological activity associated with tube and burrow structures in deep-sea sediments at the HEBBLE site, western North Atlantic. *Deep-Sea Res* 33: 755–790.
- Levin LA, Demaster DJ, McCann LD, Thomas CL (1986) Effects of giant protozoans (class: Xenophyoporea) on deep-seamount benthos. *Mar Ecol Prog Ser* 29: 99–104.
- Levin LA (1991) Interactions between metazoans and large agglutinating protozoans: implications for the community structure of deep-sea benthos. *Am Zool* 31: 886–900.
- Thistle D, Hilbig B, Eckman JE (1993) Are polychaetes sources of habitat heterogeneity for harpacticoid copepods in the deep sea? *Deep-Sea Res I* 40: 151–157.
- Soltwedel T, Vopel K (2001) Bacterial abundance and biomass in response to organism-generated habitat heterogeneity in deep-sea sediments. *Mar Ecol Prog Ser* 219: 291–298.
- Witte U, Brattegard T, Graf G, Springer B (1997) Particle capture and deposition by deep-sea sponges from the Norwegian-Greenland Sea. *Mar Ecol Prog Ser* 154: 241–252.
- Quéric NV, Arrieta JM, Soltwedel T, Arntz WE (2008) Prokaryotic community dynamics in the sedimentary microenvironment of the demosponge *Tentorium semisuberites* from deep Arctic waters. *Mar Ecol Prog Ser* 370: 87–95.

28. Carney RS, Haedrich RL, Rowe GT (1983) Zonation of fauna in the deep sea. In: Rowe GT, ed. *The Sea, Vol. 8: Deep-Sea Biology*. New York: J. Wiley and Sons. pp 371–398.
29. Thistle D, Eckman JE (1990) The effect of biologically produced structure on the benthic copepods of a deep-sea site. *Deep-Sea Res* 37: 541–554.
30. Vogel S (1994) *Life in moving fluids. The physical biology of flow*. Oxford: Princeton University Press. 467 p.
31. Friedrichs M, Graf G, Springer B (2000) Skimming flow induced over a simulated polychaete tube lawn at low population densities. *Mar Ecol Prog Ser* 192: 219–228.
32. Witte U (1995) Reproduktion, Energiestoffwechsel und Biodepositionsleistung dominanter Porifera aus der Tiefsee des Europäischen Nordmeeres. *Ber Sonderforschungsbereich 313* 53: 1–98.
33. Soltwedel T, Bauerfeind E, Bergmann M, Budaeva N, Hoste E, et al. (2005) HAUSGARTEN: multidisciplinary investigations at a deep-sea, long-term observatory in the Arctic Ocean. *Oceanogr* 18: 46–61.
34. Heip C, Vincx M, Vranken G (1985) The ecology of marine nematodes. *Oceanogr Mar Biol Ann Rev* 23: 399–489.
35. Heip C, Vincx M, Smol N, Vranken G (1982) The systematics and ecology of free-living marine nematodes. *Helmitholog Abs Ser B, Plant Nematol* 51: 1–31.
36. Platt HM, Warwick RM (1980) The significance of free-living nematodes to the littoral ecosystem. In: Irvine DEG, Farnham WF, eds. *The Shore Environment, Vol. 2 Ecosystems*. Cambridge, UK: Academic Press. pp 729–759.
37. Vanreusel A, Fonseca G, Danovaro R, Da Silva MC, Esteves AM, et al. (2010) The contribution of deep-sea macrohabitat heterogeneity to global nematode diversity. *Mar Ecol* 31(1): 6–20.
38. Warwick RM, Clarke KR (1998) Taxonomic distinctness and environmental assessment. *J Appl Ecol* 35(4): 532–543.
39. Bengtsson J (1998) Which species? What kind of diversity? Which ecosystem function? Some problems in studies of relations between biodiversity and ecosystem function. *Appl Soil Ecol* 10: 191–199.
40. Hooper DU, Chapin III FS, Ewel JJ, Hector A, Inchausti P (2005) Effects of biodiversity on ecosystem functioning: a consensus of current knowledge. *Ecol Monogr* 75(1): 3–35.
41. Armenteros M, Ruiz-Abierno A, Fernández-Garcés R, Pérez-García JA, Díaz-Asencio L, et al. (2009) Biodiversity patterns of free-living marine nematodes in a tropical bay: Cienfuegos, Caribbean Sea. *Estuar Coast Shelf S* 85: 179–189.
42. Tilman D, Lehman C (2001) Biodiversity, composition, and ecosystem processes: theory and concepts. In: Kinzig A, Pacala SW, Tilman D, eds. *The Functional Consequences of Biodiversity*. Princeton, Oxford: Princeton University Press. pp 9–41.
43. Schratzberger M, Warr K, Rogers SI (2007) Functional diversity of nematode communities in the southwestern North Sea. *Mar Env Res* 63: 368–389.
44. Wieser W (1953) Die Beziehung zwischen Mundhöhlengestalt, Ernährungsweise und Vorkommen bei freilebenden marinen Nematoden. *Ark Zool* 4: 439–484.
45. Jensen P (1987) Feeding ecology of free-living aquatic nematodes. *Mar Ecol Prog Ser* 351/2: 187–196.
46. Tietjen JH (1989) Ecology of deep-sea nematodes from the Puerto Rico Trench area and Hatteras Abyssal Plain. *Deep-Sea Res* 10: 1579–1594.
47. Thistle D, Lamshead PJD, Sherman KM (1995) Nematode tail-shape groups respond to environmental differences in the deep sea. *Vie Milieu* 45: 107–115.
48. Thistle D, Sherman KM (1985) The nematode fauna of a deep-sea site exposed to strong near-bottom currents. *Deep-Sea Res* 32: 1077–1088.
49. Vanhove S, Wittoeck J, Desmet G, Berghé van den B, Herman RL, et al. (1995) Deep-sea meiofauna communities in Antarctica: structural analysis and relation with the environment. *Mar Ecol Prog Ser* 127(1–3): 65–76.
50. Tita G, Vincx M, Desrosiers G (1999) Size spectra, body width and morphotypes of intertidal nematodes: an ecological interpretation. *J Mar Biol Assoc U.K.* 79(6): 1007–1015.
51. Soetaert K, Muthumbi AW, Heip C (2002) Size and shape of ocean margin nematodes: morphological diversity and depth-related patterns. *Mar Ecol Prog Ser* 242: 179–193.
52. Vanaverbeke J, Steyaert M, Vanreusel A, Vincx M (2003) Nematode biomass spectra as descriptors of functional changes due to human and natural impact. *Mar Ecol Prog Ser* 249: 157–170.
53. Vanaverbeke J, Soetaert K, Vincx M (2004) Changes in morphometric characteristics of nematode communities during a spring phytoplankton bloom deposition. *Mar Ecol Prog Ser* 273: 139–146.
54. Schmid B, Joshi J, Schläpfer F (2001) Empirical evidence for biodiversity-ecosystem functioning relationships. In: Kinzig A, Pacala SW, Tilman D, eds. *The Functional Consequences of Biodiversity*. Princeton & Oxford: Princeton University Press. pp 120–150.
55. Mason NWH, Mouillot D, Lee WG, Wilson JB (2005) Functional richness, functional evenness and functional divergence: the primary components of functional diversity. *Oikos* 111: 112–118.
56. McIntyre AD, Warwick RM (1984) Meiofauna techniques. In: Holme NA, McIntyre AD, eds. *Methods for the Study of marine Benthos*. IBP handbook no. 16. Oxford: Blackwell. pp 217–244.
57. Higgins RP, Thiel H (1988) *Introduction to the Study of Meiofauna*. Washington DC, London: Smithsonian Institution Press. 488 p.
58. Shannon CE, Weaver W (1963) *The Mathematical Theory of Communication*. Urbana/Ilinois: University of Illinois Press. 125 p.
59. Hurlbert SH (1971) The non-concept of species diversity: a critique and alternative parameters. *Ecology* 52: 577–586.
60. Pielou EC (1966) The measurement of diversity in different types of biological collections. *J Theor Biol* 13: 131–144.
61. Krebs CJ (1998) *Ecological Methodology*. 2nd edition. New York: Harper Collins. 624 p.
62. Legendre P, Legendre L (1998) *Numerical Ecology*. Amsterdam: Elsevier Science B. V. 853 p.
63. Magurran A (1988) *Ecological Diversity and its Measurement*. Cambridge: University Press. 192 p.
64. Zar JH (1996) *Biostatistical Analysis*. 3rd edition. London: Prentice Hall. 662 p.
65. Warwick RM, Clarke KR (1995) New 'biodiversity' measures reveal a decrease in taxonomic distinctness with increasing stress. *Mar Ecol Prog Ser* 129: 301–305.
66. Clarke KR, Warwick RM (2001) *Change in marine communities: an approach to statistical analysis and interpretation*. 2nd edition. PRIMER-E: Plymouth.
67. Lorenzen S (1994) *The Phylogenetic Systematics of Free-living Nematodes*. 2nd edition. London: The Ray Society. 152. 383 p.
68. Clarke KR, Warwick RM (2001) A further biodiversity index applicable to species lists: variation in taxonomic distinctness. *Mar Ecol Prog Ser* 216: 265–278.
69. Clarke KR, Warwick RM (1998) A taxonomic distinctness index and its statistical properties. *J Appl Ecol* 35: 523–531.
70. Warwick RM, Clarke KR (2001) Practical measures of marine biodiversity based on relatedness of species. *Oceanogr Mar Biol* 39: 207–231.
71. Primer-E (2006) *Plymouth routines in multivariate ecological research*. Plymouth, UK: Primer 6, version 6.1.6.
72. Wieser W (1960) Benthic studies in Buzzards Bay. II. The meiofauna. *Limnol Oceanogr* 5: 121–137.
73. Boucher G (1972) Distribution quantitative et qualitative des Nématodes dune station de vase terrigène côtière de Banyuls-sur-Mer. *Cah Biol Mar* 13: 457–474.
74. Ward AR (1975) Studies on the sublittoral free living nematodes of Liverpool Bay. 2. Influence of sediment composition on the distribution of marine nematodes. *Mar Biol* 30(3): 217–225.
75. Moens T, Vincx M (1997) Observations on the feeding ecology of estuarine nematodes. *J Mar Biol Assoc U.K.* 77(1): 211–227.
76. Moens T, Verbeeck L, Vincx M (1999) Preservation and incubation time-induced bias in tracer-aided grazing studies on meiofauna. *Mar Biol* 133(1): 69–77.
77. Tita G, Desrosiers G, Vincx M, Gagne JP, Locat J (2001) Diversity and vertical distribution of nematode assemblages: the Saguenay Fjord (Quebec, Canada). *Cah Biol Mar* 42(3): 263–274.
78. Lamshead PJD, Brown CJ, Ferrero TJ, Mitchell NJ, Smith CR, et al. (2002) Latitudinal diversity patterns of deep-sea marine nematodes and organic fluxes: a test from the central equatorial Pacific. *Mar Ecol Prog Ser* 236: 129–135.
79. Warwick RM, Dexter D, Kuperman B (2002) Free-living nematodes from the Salton Sea. *Hydrobiologia* 473(1–3): 121–128.
80. Danovaro R, Gambi C (2002) Biodiversity and trophic structure of nematode assemblages in seagrass systems: evidence for a coupling with changes in food availability. *Mar Biol* 141(4): 667–677.
81. Gambi C, Vanreusel A, Danovaro R (2003) Biodiversity of nematode assemblages from deep-sea sediments of the Atacama Slope and Trench (South Pacific Ocean). *Deep-Sea Res* 50: 103–117.
82. Rzezniak-Orignac J, Fichet D, Boucher G (2003) Spatio-temporal structure of the nematode assemblages of the Brouage mudflat (Marennes Oleron, France). *Estuar Coast Shelf Sci* 58(1): 77–88.
83. Platt HM, Warwick RM (1983) *Free-Living Marine Nematodes. Part I: British Enoplids: Synopses of the British Fauna (New Series)* 28. Cambridge: University Press. 307 p.
84. Trautspurger W (2000) The biology and ecology of lotic nematodes. *Freshwater Biol* 44: 29–45.
85. Riemann F (1974) On hemisessile nematodes with flagelliform tails living in marine soft bottoms and on micro-tubes found in deep-sea sediments. *Mikrofauna Meeresbodens* 40: 1–15.
86. Simberloff D, Dayan T (1991) The guild concept and the structure of ecological communities. *Ann Rev Ecol Syst* 22: 115–143.
87. Wilson JB (1999) Guilds, functional types and ecological groups. *Oikos* 86: 507–522.
88. Leibold M (1995) The niche concept revisited: mechanistic models and community context. *Ecology* 76: 1371–1382.
89. Petchey OL, Gaston KJ (2002) Functional diversity (FD), species richness and community composition. *Ecol Letters* 5: 402–411.
90. Petchey OL (2004) On the statistical significance of functional diversity effects. *Funct Ecol* 18: 297–303.
91. Elliot JM (1971) Some methods for the statistical analysis of samples of benthic invertebrates. The ferry house amble, Westmorland: *Freshwater Biol Assoc* 25: 144.
92. Bongers T (1990) The maturity index: an ecological measure of environmental disturbance based on nematode species composition. *Oecologia* 83: 14–19.
93. Bongers T, Alkemade R, Yeates GW (1991) Interpretation of disturbance-induced maturity decrease in marine nematode assemblages by means of Maturity Index. *Mar Ecol Prog Ser* 76: 135–142.

94. Bongers T, de Goede RGM, Korthals G, Yeates GW (1995) Proposed changes of c-p classification for nematodes. *Russ J Nematol* 3: 61–62.
95. Gingold R, Mundo-Ocampo M, Holovachov O, Rocha-Olivares A (2010) The role of habitat heterogeneity in structuring of intertidal free-living marine nematodes. *Mar Biol* 157: 1741–1753.
96. Davidowitz G, Rosenzweig ML (1998) The latitudinal gradient of species diversity among North American grasshoppers (Acrididae) within a single habitat: a test of the spatial heterogeneity hypothesis. *J Biogeogr* 25: 553–560.
97. French DD, Picozzi N (2002) 'Functional groups' of bird species, biodiversity and landscapes in Scotland. *J Biogeogr* 29: 231–259.
98. Hendrickx F, Maelfait JP, Van Wingerden W, Schweiger O, Speelmans M, et al. (2007) How landscape structure, land-use intensity and habitat diversity affect components of total arthropod diversity in agricultural landscapes. *J Appl Ecol* 44: 340–351.
99. Kerr JT, Packer L (1997) Habitat heterogeneity as a determinant of mammal species richness in high-energy regions. *Nature* 385: 252–254.
100. Tews J, Brose U, Grimm V, Tielborger K, Wichmann MC, et al. (2004) Animal species diversity driven by habitat heterogeneity/diversity: the importance of keystone structures. *J Biogeogr* 31: 79–92.
101. Cramer MJ, Willig MR (2005) Habitat heterogeneity, species diversity and null models. *Oikos* 108: 209–218.
102. McClain CR, Barry JP (2010) Habitat heterogeneity, disturbance, and productivity work in concert to regulate biodiversity in deep submarine canyons. *Ecology* 91(4): 964–976.
103. Holt AR, Warren PH, Gaston KJ (2004) The importance of habitat heterogeneity, biotic interactions and dispersal in abundance-occupancy relationships. *J Anim Ecol* 73: 841–851.
104. Snyder RE, Chesson P (2003) Local dispersal can facilitate coexistence in the presence of permanent spatial heterogeneity. *Ecol Letters* 6: 301–309.
105. Snyder RE, Chesson P (2004) How the spatial scales of dispersal, competition, and environmental heterogeneity interact to affect coexistence. *Am Nat* 164(5): 633–650.
106. Nee S, Gregory RD, May RM (1991) Core and satellite species: theory and artefacts. *Oikos* 62: 83–87.
107. Hartley S, Shorrocks B (2002) A general framework for the aggregation model of coexistence. *J Anim Ecol* 71: 651–662.
108. Kingsland S (1985) *Modeling Nature*. Chicago: University of Chicago Press. 213 p.
109. Begon M, Townsend CR, Harper JL (2006) *Ecology. From Individuals to Ecosystems*. Malden, Oxford, Carlton: Blackwell Publishing Ltd. 738 p.
110. Wiens JA (1977) On competition and variable environments. *Amer Sci* 65: 590–597.
111. Zobel M (1992) Plant species co-existence: the role of historical, evolutionary and ecological factors. *Oikos* 65: 314–320.
112. Putman RJ (1994) *Community Ecology*. London: Chapman & Hall. 178 p.
113. Leibold M (1998) Similarity and local co-existence of species in regional biotas. *Evol Ecol* 12: 95–110.
114. Dinet A, Vivier MH (1979) The meiobenthic nematode fauna of the deep Bay of Biscay. 2. The population component and their diversity. *Cah Biol Mar* 20: 109–123.
115. Jensen P (1988) Nematode assemblages in the deep-sea benthos of the Norwegian Sea. *Deep-Sea Res I* 35: 1173–1184.
116. Vanhove S, Arntz WE, Vincx M (1999) Comparative study of the nematode communities on the southeastern Weddell Sea shelf and slope (Antarctica). *Mar Ecol Prog Ser* 181: 237–256.
117. Vanhove S, Vermeeren H, Vanreusel A (2004) Meiofauna towards the South Sandwich Trench (750–6300 m), focus on nematodes. *Deep-Sea Res II* 51: 1665–1687.
118. Netto SA, Gallucci F, Fonseca GFC (2005) Meiofauna communities of continental slope and deep-sea sites off SE Brazil. *Deep-Sea Res I* 52(5): 845–859.
119. Moullot D, Gaillard S, Aliaume C, Verlaque M, Belsher T, et al. (2005) Ability of taxonomic diversity indices to discriminate coastal lagoon environments based on macrophyte communities. *Ecol Ind* 5: 1–17.
120. von Euler F, Svensson S (2001) Taxonomic distinctness and species richness as measures of functional structure in bird assemblages. *Oecologia* 129: 304–311.
121. Tolimieri N, Anderson MJ (2010) Taxonomic distinctness of demersal fishes of the California Current: moving beyond simple measures of diversity for marine ecosystem-based management. *PLoS One* 5(5): e10653.
122. Magurran AE (2003) *Measuring biological diversity*. London: Blackwell Publishing. 260 p.
123. Heino J, Soininen J, Lappalainen J, Virtanen R (2005) The relationship between species richness and taxonomic distinctness in freshwater organisms. *Limnol Oceanogr* 50(3): 978–986.
124. Steneck R (2001) Functional groups. In: Levin S, Daily GC, Colwell RK, Lubchenco J, Mooney HA, et al. eds. *The Encyclopedia of Biodiversity* (vol. 3). San Diego: Academic Press. pp 121–139.
125. Abrams PA (1983) The theory of limiting similarity. *Ann Rev Ecol Syst* 14: 359–376.
126. Roughgarden J (1986) Predicting invasions and rates of spread. In: Mooney HA, Drake JA, eds. *Ecology of Biological Invasions of North America and Hawaii*. Ecological Studies, Number 58. New York: Springer-Verlag. pp 179–188.
127. Gerino M, Stora G, François-Caracillet F, Gilbert F, Poggiale J-C, et al. (2003) Macro-invertebrate functional groups in freshwater and marine sediments: a common mechanistic classification. *Vie Milieu* 53: 221–231.
128. Diaz S, Cabido M (2001) Vive la différence: plant functional diversity matters to ecosystem processes. *Trends Ecol Evol* 16: 646–655.
129. Landsberg J (1999) Response and effect - different reasons for classifying plant functional types under grazing. In: Eldridge D, Freudenberger D, eds. *People and Rangelands: Building the Future*. Townsville: Proceedings of the VI International Rangeland Congress. VI International Rangeland Congress. pp 911–915.
130. Walker B, Kinzig A, Langridge J (1999) Plant attribute diversity, resilience, and ecosystem function: the nature and significance of dominant and minor species. *Ecosystems* 2: 95–113.
131. Hooper DU, Solan M, Symstad A, Diaz S, Gessner MO, et al. (2002) Species diversity, functional diversity, and ecosystem functioning. In: Loreau M, Naeem S, Inchausti P, eds. *Biodiversity and Ecosystem Functioning*. Oxford: University Press. pp 195–248.
132. Loreau M (2000) Biodiversity and ecosystem functioning: recent theoretical advances. *OIKOS* 91: 3–17.
133. Grime JP (1998) Benefits of plant diversity to ecosystems: immediate, filter and founder effects. *J Ecol* 86: 901–910.
134. Naeem S (1998) Species redundancy and ecosystem reliability. *Conser Biol* 12: 39–45.
135. Chapin III FSE, Zavaleta S, Eviner VT, Naylor RL, Vitousek PM, et al. (2000) Consequences of changing biodiversity. *Nature* 405: 234–242.
136. Huston MA (1994) *Biological Diversity: The Coexistence of Species on Changing Landscapes*. Cambridge: Cambridge University Press. 681 p.
137. Gaston KJ (1996) *Biodiversity: A Biology of Numbers and Differences*. Oxford: Blackwell. 396 p.
138. Lawton JH (1999) Biodiversity and ecosystem processes: theory, achievements and future directions. In: Kato M, ed. *The Biology of Biodiversity*. Tokyo: Springer Verlag. pp 119–131.
139. Giller PS, Hillebrand H, Berninger U-G, Gessner MO, Hawkins S, et al. (2004) Biodiversity effects on ecosystem functioning: emerging issues and their experimental test in aquatic environments. *Oikos* 104: 423–436.
140. Rosenfeld JS (2002) Functional redundancy in ecology and conservation. *Oikos* 98: 156–162.
141. Hutchinson GE (1959) Homage to Santa Rosalina, or why are there so many kinds of animals? *Am Nat* 93: 145–159.
142. Lawton JH, Brown VK (1993) Redundancy in ecosystems. In: Schulze E-D, Mooney HA, eds. *Biodiversity and Ecosystem Function*. New York: Springer Verlag. pp 255–270.
143. Ruesink JL, Srivastava DS (2001) Numerical and per capita responses to species loss: mechanisms maintaining ecosystem function in a community of stream insect detritivores. *Oikos* 93: 211–234.
144. Tilman D (1996) Biodiversity: population versus ecosystem stability. *Ecology* 77: 350–363.
145. Tilman D (1999) The ecological consequences of changes in biodiversity: a search for general principles. *Ecology* 80: 1455–1474.
146. Naeem S, Li S (1997) Biodiversity enhances ecosystem reliability. *Nature* 390: 507–509.
147. Tilman D, Lehman C, Bristow CE (1998) Diversity-stability relationships: statistical inevitability or ecological consequence? *Am Nat* 151: 277–282.
148. Folke C, Holling CS, Perrings C (1996) Biological diversity, ecosystems and the human scale. *Ecol Appl* 6: 1018–1024.
149. Petchey OL, Hector A, Gaston KJ (2004) How do different measures of functional diversity perform? *Ecology* 85(3): 847–857.
150. Vitousek PM, Hooper DU (1993) Biological diversity and terrestrial biogeochemistry. In: Schulze E-D, Mooney HA, eds. *Biodiversity and Ecosystem Function*. New York: Springer Verlag. pp 3–14.
151. Carney RS (1997) Basing conservation policies for the deep-sea floor on current-diversity concepts: a consideration of rarity. *Biodivers Conserv* 6: 1463–1485.
152. Grant A (2000) Deep-sea diversity: overlooked messages from shallow-water sediments. *P.S.Z.N.: Mar Ecol* 2: 97–112.
